# Supplementary material
Source: HighWire-hosted journal article supplement (http://www.jrheum.org/highwire/filestream/31372/field_highwire_adjunct_files/0/160584_Data_Suppl.pdf)
Supplement: 160584_Data_Suppl.pdf [file 160584_Data_Suppl.pdf]

**Supplementary Figure 1.** Enteseal sites evaluated with MASES and PDUS examination.

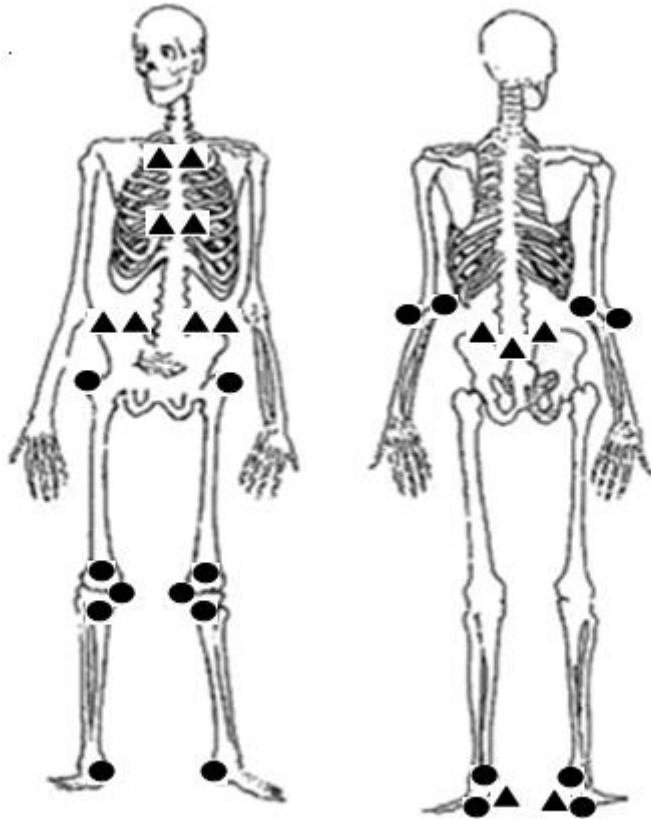

▲ 13 entheses examined with MASES

● 9 bilateral entheses examined with PDUS

**Supplementary Table 1.** Differences in patient characteristics between patients with and without structural and inflammatory lesions.

|                            | Structural lesions |                |         | Inflammatory lesions |                |       |
|----------------------------|--------------------|----------------|---------|----------------------|----------------|-------|
|                            | Yes<br>n=74        | No<br>n=37     | p-value | Yes<br>n=88          | No<br>n=23     | p     |
| Gender (male) (n, %)       | 56 (76)            | 23 (62)        | 0.138   | 65 (74)              | 14 (61)        | 0.221 |
| Age (yrs)                  | 44.4 $\pm$ 11.4    | 39.8 $\pm$ 9.0 | 0.036*  | 43.4 $\pm$ 11.3      | 40.9 $\pm$ 9.1 | 0.338 |
| Duration of symptoms (yrs) | 16.5 (2-49)        | 2 (2-35)       | 0.052   | 21 (2-47)            | 15 (2-49)      | 0.674 |
| Time since diagnosis (yrs) | 9 (0-37)           | 3.5 (0-24)     | 0.033*  | 11 (0-37)            | 6.5 (0-35)     | 0.288 |
| HLA-B27+ (n, %)            | 61 (82)            | 29 (78)        | 0.607   | 71 (81)              | 19 (83)        | 0.834 |
| mSASSS score (range 0-72)  | 12.9 (1.1-72)      | 6.9 (0-72)     | 0.007*  | 9.8 (0-72)           | 11 (3-72)      | 0.699 |
| MASES (range 0-13)         | 2 (0-12)           | 3 (0-10)       | 0.068   | 2 (0-12)             | 3 (0-9)        | 0.226 |
| BASDAI (range 0-10)        | 5.8 (1-9)          | 6.1 (3-9)      | 0.668   | 6 (3-9)              | 5.8 (1-9)      | 0.925 |
| ASDAS <sub>crp</sub>       | 3.9 (2-6)          | 3.7 (2-5)      | 0.150   | 3.8 (2-6)            | 3.8 (2-5)      | 0.477 |
| CRP (mg/L)                 | 16 (2-99)          | 11 (2-55)      | 0.022*  | 15 (2-99)            | 15 (2-41)      | 0.802 |
| ESR (mm/hr)                | 21.5 (2-90)        | 23 (2-80)      | 0.898   | 21 (2-90)            | 26 (6-61)      | 0.936 |
| BASFI (range 0-10)         | 6.3 (2-10)         | 5.4 (1-9)      | 0.176   | 6.1 (1-10)           | 6.5 (4-10)     | 0.838 |
| ASQOL (range 0-18)         | 10 (1-18)          | 10 (1-17)      | 0.985   | 10 (1-18)            | 11 (1-17)      | 0.761 |

Online supplement to Ultrasound Evaluation of the Entheses in Daily Clinical Practice during Tumor Necrosis Factor- $\alpha$  Blocking Therapy in Patients with Ankylosing Spondylitis, the *Journal of Rheumatology*, doi:10.3899/jrheum.160584

**(Supplementary Table 1 cont.)** Values are mean  $\pm$  SD or median (range) unless otherwise indicated. \*  $p < 0.05$ . AS, Ankylosing Spondylitis; HLA-B27+, human leukocyte antigen B27 positive; IBD, inflammatory bowel disease; MASES, Maastricht Ankylosing Spondylitis Enthesitis Score; BASDAI, Bath Ankylosing Spondylitis Disease Activity Index; ASDAS, Ankylosing Spondylitis Disease Activity Score; CRP, C-reactive protein; ESR, erythrocyte sedimentation rate; BASFI, Bath Ankylosing Spondylitis Functional Index; ASQOL, Ankylosing Spondylitis Quality of Life.
